# Supplementary material for: MLST typing of Treponema pallidum subsp. pallidum in the Czech Republic during 2004-2017: Clinical isolates belonged to 25 allelic profiles and harbored 8 novel allelic variants
Source: PubMed Central journal article supplement (PMC6544256; doi:10.1371/journal.pone.0217611), 2019-05-31
Supplement: pone.0217611.s001.pdf [file pone.0217611.s001.pdf]

**S1 Fig. Alignment of the different allelic variants in the TP0136, TP0548 and TP0705 loci identified in this study (new alleles are in italics).**

**TP0136**

A. SS14-like isolates

| A.Coordinates according to TPA SS14 (CP004011.1) | 545-546  | 546-547  | 547-548  | 548-549   | 550      | 550-551    | 553      | 555      | 556      | 558      | 559      | 559-560  | 563      | 566      | 567      | 569      | 571      | 577      | 587      | 686      |
|--------------------------------------------------|----------|----------|----------|-----------|----------|------------|----------|----------|----------|----------|----------|----------|----------|----------|----------|----------|----------|----------|----------|----------|
| TPA SS14                                         | -        | -        | -        | -         | A        | -          | A        | C        | A        | C        | T        | -        | G        | T        | T        | A        | A        | C        | C        | G        |
| TP_0136_1                                        | -        | -        | -        | -         | A        | -          | A        | C        | A        | C        | T        | -        | G        | T        | T        | A        | A        | C        | C        | G        |
| TP_0136_4                                        | -        | -        | -        | -         | A        | -          | A        | C        | A        | C        | T        | -        | G        | T        | T        | A        | A        | <b>T</b> | C        | G        |
| TP_0136_17                                       | -        | -        | -        | -         | A        | -          | A        | C        | A        | C        | T        | -        | G        | T        | T        | A        | A        | C        | C        | <b>A</b> |
| TP_0136_18                                       | <b>T</b> | <b>A</b> | <b>G</b> | <b>GA</b> | <b>G</b> | <b>CTC</b> | <b>G</b> | <b>G</b> | <b>G</b> | <b>G</b> | <b>A</b> | <b>A</b> | <b>C</b> | <b>C</b> | <b>G</b> | <b>C</b> | <b>T</b> | <b>A</b> | <b>G</b> | <b>G</b> |

B. Nichols-like isolates

| B. Coordinates according to TPA Nichols (CP004010.2) | 1205     |
|------------------------------------------------------|----------|
| TPA Nichols                                          | G        |
| TP_0136_9                                            | <b>A</b> |

**TP0548**

A. SS14-like isolates

| A.Coordinates according to TPA SS14 (CP004011.1) | 154      | 155      | 158      | 163      | 167      | 448      | 485      | 488      | 491      | 503      | 516      | 772      | 773      | 775      | 965      |
|--------------------------------------------------|----------|----------|----------|----------|----------|----------|----------|----------|----------|----------|----------|----------|----------|----------|----------|
| TPA_SS14                                         | G        | G        | G        | A        | G        | T        | C        | G        | G        | A        | G        | A        | A        | G        | A        |
| TP_0548_1                                        | G        | G        | G        | A        | G        | T        | C        | G        | G        | A        | G        | A        | A        | G        | A        |
| TP_0548_3                                        | <b>A</b> | G        | <b>A</b> | A        | G        | T        | C        | G        | G        | A        | G        | A        | A        | G        | A        |
| TP_0548_4                                        | <b>A</b> | G        | <b>A</b> | <b>A</b> | G        | T        | C        | <b>A</b> | G        | A        | G        | A        | A        | G        | A        |
| TP_0548_5                                        | <b>A</b> | G        | <b>A</b> | <b>G</b> | G        | T        | C        | G        | G        | A        | G        | A        | A        | G        | A        |
| TP_0548_26                                       | <b>A</b> | G        | <b>A</b> | <b>A</b> | G        | T        | C        | G        | G        | A        | G        | <b>G</b> | <b>A</b> | G        | A        |
| TP_0548_27                                       | <b>A</b> | G        | <b>A</b> | <b>A</b> | G        | T        | C        | G        | G        | A        | G        | <b>G</b> | <b>A</b> | G        | <b>G</b> |
| TP_0548_28                                       | <b>A</b> | G        | <b>A</b> | <b>A</b> | G        | T        | C        | G        | G        | <b>G</b> | G        | <b>A</b> | <b>G</b> | G        | A        |
| TP_0548_29                                       | <b>A</b> | G        | <b>A</b> | <b>A</b> | <b>A</b> | T        | C        | G        | G        | A        | G        | A        | A        | G        | A        |
| TP_0548_30                                       | <b>A</b> | G        | <b>A</b> | <b>A</b> | G        | T        | C        | G        | G        | A        | G        | A        | A        | G        | A        |
| TP_0548_31                                       | <b>A</b> | G        | <b>A</b> | <b>A</b> | G        | T        | C        | G        | G        | A        | G        | A        | A        | <b>T</b> | A        |
| TP_0548_32                                       | G        | G        | <b>A</b> | <b>A</b> | G        | T        | C        | G        | G        | A        | G        | A        | A        | G        | A        |
| TP_0548_33                                       | G        | G        | G        | A        | G        | <b>C</b> | C        | G        | G        | A        | G        | A        | A        | G        | A        |
| TP_0548_34                                       | G        | G        | G        | A        | G        | T        | C        | G        | G        | A        | <b>T</b> | A        | A        | G        | A        |
| TP_0548_35                                       | G        | G        | G        | A        | G        | T        | <b>A</b> | G        | <b>A</b> | A        | G        | A        | A        | G        | A        |
| TP_0548_36                                       | G        | <b>A</b> | G        | A        | G        | T        | C        | G        | G        | A        | G        | A        | A        | G        | A        |

B. Nichols-like isolates

|                                                      |     |     |
|------------------------------------------------------|-----|-----|
| B. Coordinates according to TPA Nichols (CP004010.2) | 170 | 208 |
| TPA_Nichols                                          | G   | C   |
| TP_0548_7                                            | A   | A   |

**TP0705**

| Coordinates according to TPA SS14 (CP004011.1) | 1498     | 1516     | 1517     | 1828     | 1844     | 1873     | 1948     | 2111     | 2122     |
|------------------------------------------------|----------|----------|----------|----------|----------|----------|----------|----------|----------|
| TPA SS14 and TPA Nichols                       | C        | G        | C        | G        | C        | A        | C        | C        | G        |
| TP_0705_1                                      | C        | G        | C        | G        | C        | <b>G</b> | C        | C        | <b>A</b> |
| TP_0705_3                                      | C        | <b>A</b> | C        | G        | C        | A        | C        | C        | G        |
| TP_0705_8                                      | C        | G        | <b>T</b> | G        | C        | A        | C        | C        | G        |
| TP_0705_9                                      | C        | G        | C        | G        | C        | A        | C        | C        | <b>A</b> |
| TP_0705_10                                     | C        | G        | C        | G        | C        | A        | C        | C        | G        |
| TP_0705_14                                     | <b>T</b> | G        | C        | G        | C        | A        | C        | C        | G        |
| TP_0705_15                                     | C        | G        | C        | <b>A</b> | C        | A        | C        | <b>A</b> | G        |
| TP_0705_16                                     | C        | G        | C        | G        | <b>A</b> | A        | <b>A</b> | C        | G        |
