# Supplementary material for: MLST typing of Treponema pallidum subsp. pallidum in the Czech Republic during 2004-2017: Clinical isolates belonged to 25 allelic profiles and harbored 8 novel allelic variants
Source: PubMed Central journal article supplement (PMC6544256; doi:10.1371/journal.pone.0217611), 2019-05-31
Supplement: pone.0217611.s002.pdf [file pone.0217611.s002.pdf]

**S1 Table. Primers used for the nested-PCR**

| Locus                    | External primers (5-3) | Coordinates <sup>1</sup>     | Length of PCR product | Internal primers (5-3) | Coordinates <sup>1</sup> | Length of PCR product |
|--------------------------|------------------------|------------------------------|-----------------------|------------------------|--------------------------|-----------------------|
| TP0136                   | AACCCGTTAGCGCCCAACAT   | 157804-157823                | 1789 bp               | AGTGTCTTCTCGTCCGTTC    | 158206-158225            | 1206 bp               |
|                          | TCCCAGCTCAGCCGAATCTC   | 159570-159589                |                       | CACGTGGTGGTGTCAAACCTT  | 159392-159411            |                       |
| TP0548                   | TGGGGCACTAAACCGGAAGA   | 593136-593155                | 1567 bp               | GCGGTCCCTATGATATCGTGT  | 593285-593305            | 1065 bp               |
|                          | TACGGGCATTTGCGGATAGG   | 594683-594702                |                       | GAGCCACTTCAGCCCTACTG   | 594330-594349            |                       |
| TP0705                   | GGTCTATATGCAGCCCTTCTTC | 772663-772684                | 1181 bp               | TGCGGCTTATCCTGATGAATAG | 772917-772938            | 803 bp                |
|                          | GCTTGAGAACGATACCGGATAC | 773822-773843                |                       | TATTCTGCGGCGTTGGATAG   | 773700-773719            |                       |
| 23S<br>rDNA <sup>2</sup> | CGAAGGGAAGCAGGTGTAGT   | 234704-234723, 283149-283168 | 1666 and<br>1658 bp   | GTACCGCAAACCGACACAG    | 234768-234786            | 629 bp                |
|                          | GCGCGAACACCTCTTTTTAC   | 236350-236369                |                       | AGTCAAACCGCCACCTAC     | 235378-235396            |                       |
|                          | GAACCGTCCCTGAAAACCTCA  | 284787-284806                |                       |                        |                          |                       |

<sup>1</sup>According to the Nichols genome (CP004010.2).

<sup>2</sup>Both copies of 23S rDNA gene were amplified
