# Supplementary material for: MLST typing of Treponema pallidum subsp. pallidum in the Czech Republic during 2004-2017: Clinical isolates belonged to 25 allelic profiles and harbored 8 novel allelic variants
Source: PubMed Central journal article supplement (PMC6544256; doi:10.1371/journal.pone.0217611), 2019-05-31
Supplement: pone.0217611.s003.pdf [file pone.0217611.s003.pdf]

**S2 Table. Allelic profiles identified in partially typed samples.**

|            | Allelic profile <sup>1,4</sup> | 23S rDNA <sup>2</sup> | No. of samples | Genetic group <sup>3</sup> |
|------------|--------------------------------|-----------------------|----------------|----------------------------|
| <b>1.</b>  | 1.X.1.                         | R8(13)/S(3)/X(4)      | 20             | SS14-like                  |
|            | 1.3.X.                         | R8(9)/S(1)/X(1)       | 11             | SS14-like                  |
|            | X.3.1.                         | R8(6)/X(1)            | 7              | SS14-like                  |
|            | X.X.1.                         | R8(8)/S(2)/X(7)       | 17             | NA                         |
|            | X.3.X.                         | R8(3)/X(3)            | 6              | SS14-like                  |
|            | 1.X.X.                         | R9(1)/S(4)/X(6)       | 11             | SS14-like                  |
| <b>2.</b>  | 1.1.X.                         | R9(1)/S(9)            | 10             | SS14-like                  |
|            | X.1.X.                         | R8(1)/R9(3)/S(3)/X(2) | 9              | SS14-like                  |
| <b>3.</b>  | X.1.8.                         | S(6)/X(1)             | 7              | SS14-like                  |
|            | 1.X.8.                         | R8(1)/S(1)            | 2              | SS14-like                  |
|            | X.X.8.                         | R8(1)/S(1)/X(2)       | 4              | NA                         |
| <b>4.</b>  | 1.X.3.                         | R9(5)/X(1)            | 6              | SS14-like                  |
|            | X.1.3.                         | R9(1)                 | 1              | SS14-like                  |
|            | X.X.3.                         | R8(1)/R9(1)/X(1)      | 3              | NA                         |
| <b>5.</b>  | X.26.1.                        | R8(3)/X(2)            | 5              | SS14-like                  |
|            | 1.26.X.                        | R8(2)                 | 2              | SS14-like                  |
|            | x.26.X.                        | R8(1)                 | 1              | SS14-like                  |
| <b>6.</b>  | 1.36.X.                        | S(2)                  | 2              | SS14-like                  |
| <b>7.</b>  | X.7.3.                         | R8(2)                 | 2              | Nichols-like               |
|            | 9.X.3.                         | R8(1)                 | 1              | Nichols-like               |
|            | 9.X.X.                         | X(1)                  | 1              | Nichols-like               |
| <b>8.</b>  | 1.30.X.                        | S(1)                  | 1              | SS14-like                  |
| <b>9.</b>  | 1.27.X. <sup>5</sup>           | R8(1)                 | 1              | SS14-like                  |
| <b>10.</b> | X.1.10.                        | X(1)                  | 1              | SS14-like                  |
|            | X.X.10.                        | X(5)                  | 5              | NA                         |
| <b>11.</b> | X.35.1.                        | R8(1)                 | 1              | SS14-like                  |
| <b>12.</b> | X.33.3.                        | R9(1)                 | 1              | SS14-like                  |
| <b>13.</b> | X.28.1. <sup>5</sup>           | X(1)                  | 1              | SS14-like                  |
| <b>14.</b> | X.32.10. <sup>5</sup>          | X(1)                  | 1              | SS14-like                  |
| <b>15.</b> | X.34.X.                        | R9(1)                 | 1              | SS14-like                  |
| <b>16.</b> | X.X.14. <sup>5</sup>           | R8(1)                 | 1              | NA                         |
| <b>17.</b> | X.X.15. <sup>5</sup>           | R8(1)                 | 1              | NA                         |
| <b>18.</b> | X.X.9.                         | R8(1)                 | 1              | NA                         |

<sup>1</sup> Allelic profiles based on sequences of TP0136, TP0548, and TP0705 [15].

<sup>2</sup> Locus encoding resistance to macrolide antibiotics: S=sensitive, R8=A2058G mutation, R9=A2059G mutation, X=undetermined. Both A2058G and A2059G mutations result in resistance to macrolide antibiotics.

<sup>3</sup> According to Nechvátal *et al.*, 2014 [23].

<sup>4</sup> Possible same allelic profiles are grouped together

<sup>5</sup> Newly identified allelic profiles.
